# Supplementary material for: Performance comparison of first-order conditional estimation with interaction and Bayesian estimation methods for estimating the population parameters and its distribution from data sets with a low number of subjects
Source: Springer Nature journal article supplement (doi:10.1186/s12874-017-0427-0), 2017-12-01

# THEO data

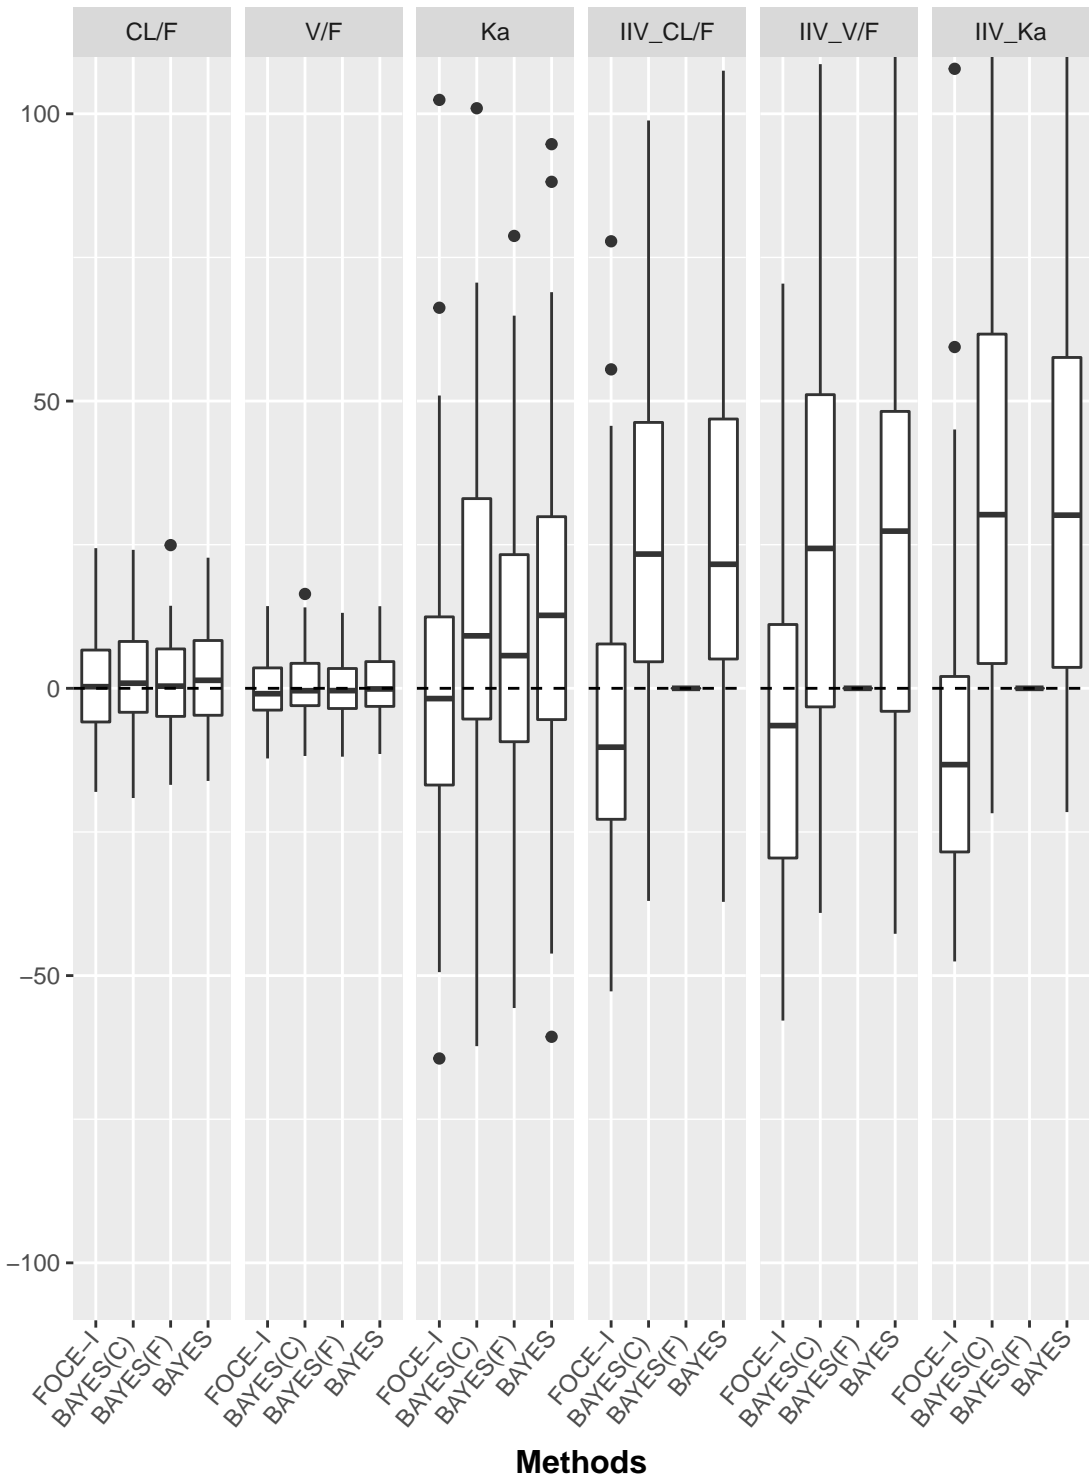

Supplement: MOESM2 [file 15272150]
